# Supplementary material
Source: PubMed Central journal article supplement (PMC2685709)
Supplement: M809724200_1.pdf [file M809724200_1.pdf]

**Supplemental Table S1.** Oligonucleotides used for site-directed mutagenesis.

| Mutation       | Oligonucleotides (5' to 3')                                                                    |
|----------------|------------------------------------------------------------------------------------------------|
| Pto(L68I/K69R) | F: GATGGAGCAAAGGTCGCGATCCGTAGGCGTACACCTGAGTCC<br>R: GGACTCAGGTGTACGCCTACGGATCGCGACCTTTGCTCCATC |
| Pto(D182E)     | F: CCCTTTCTTGGATATTCCGAATTCAGTAATTTTTGGCAC<br>R: GTGCCAAAAATTACTGAATTCGGAATATCCAAGAAAGGG       |
| Pto(T199A)     | F: CAAACCCATCTTAGCGCAGTAGTGAAAGGAAC<br>R: GTTCCTTTCACTACTGCGCTAAGATGGGTTTG                     |

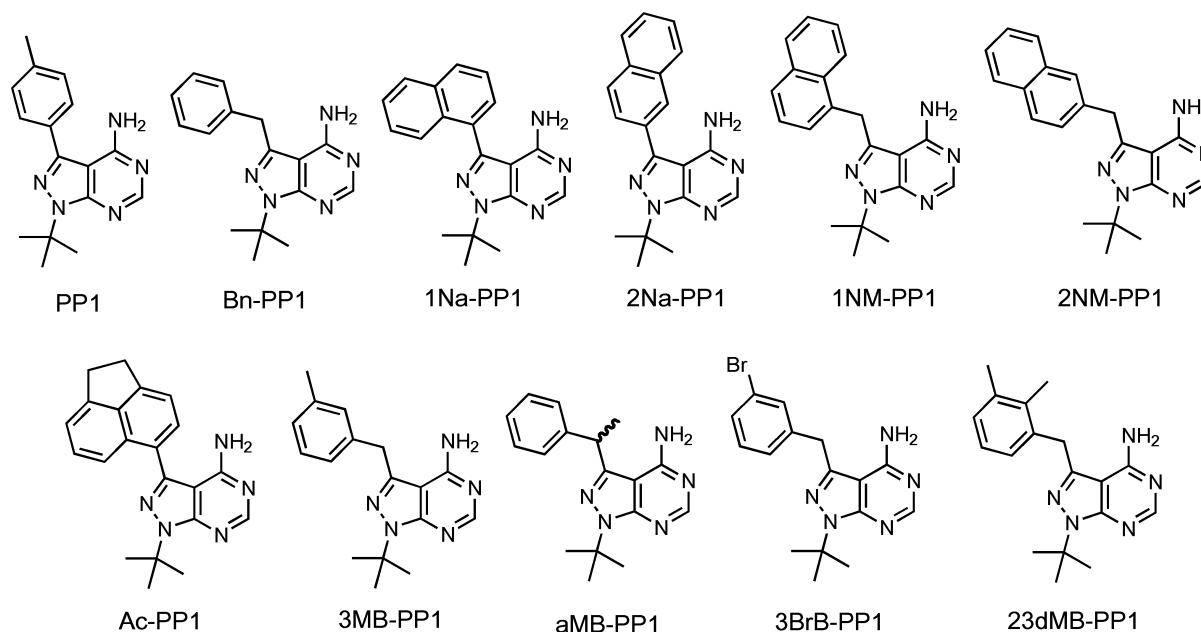

**Supplemental Fig. S1.** Chemical structure of PP1 analogs.

PP1: 1-*tert*-Butyl-3-*p*-tolyl-1*H*-pyrazolo[3,4-*d*]pyrimidin-4-ylamine.

Bn-PP1: 3-Benzyl-1-*tert*-butyl-1*H*-pyrazolo[3,4-*d*]pyrimidin-4-ylamine.

1NA-PP1: 1-*tert*-Butyl-3-naphthalen-1-yl-1*H*-pyrazolo[3,4-*d*]pyrimidin-4-ylamine.

2NA-PP1: 1-*tert*-Butyl-3-naphthalen-2-yl-1*H*-pyrazolo[3,4-*d*]pyrimidin-4-ylamine.

1NM-PP1: 1-*tert*-Butyl-3-naphthalen-1-ylmethyl-1*H*-pyrazolo[3,4-*d*]pyrimidin-4-ylamine.

2NM-PP1: 1-*tert*-Butyl-3-naphthalen-2-ylmethyl-1*H*-pyrazolo[3,4-*d*]pyrimidin-4-ylamine.

Ac-PP1: 3-Acenaphthen-5-yl-1-*tert*-butyl-1*H*-pyrazolo[3,4-*d*]pyrimidin-4-ylamine.

3MB-PP1: 1-*tert*-Butyl-3-(3-methylbenzyl)-1*H*-pyrazolo[3,4-*d*]pyrimidin-4-ylamine.

aMB-PP1: 1-*tert*-butyl-3-(1-phenylethyl)-1*H*-pyrazolo[3,4-*d*]pyrimidin-4-amine.

3BrB-PP1: 3-(3-bromobenzyl)-1-*tert*-butyl-1*H*-pyrazolo[3,4-*d*]pyrimidin-4-amine.

23dMB-PP1: 1-*tert*-Butyl-3-(2,3-dimethylbenzyl)-1*H*-pyrazolo[3,4-*d*]pyrimidin-4-ylamine.

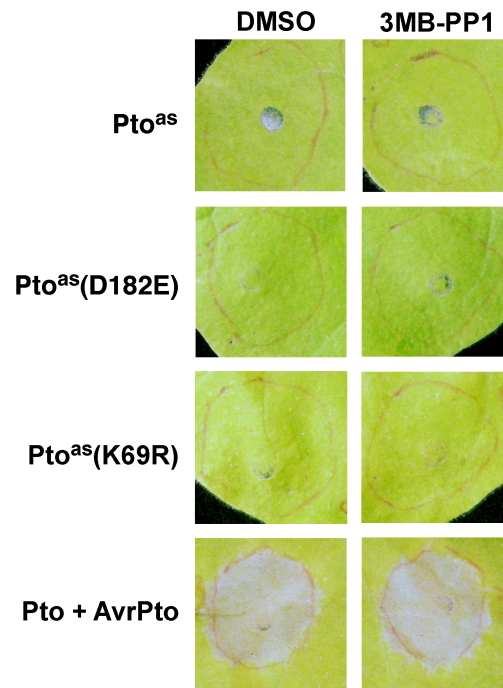

**Supplemental Fig. S2.** Treatment of *N. benthamiana* leaves expressing Pto<sup>as</sup> mutants with 3MB-PP1 does not elicit an AvrPto-independent HR.

*N. benthamiana* leaves were infiltrated with *Agrobacterium* strains for the expression of the indicated Pto forms in the absence of AvrPto, or expression of Pto and AvrPto, as positive control. Twenty hours later, infiltrated areas were treated with 3MB-PP1 or DMSO as control, and monitored during 4 days for the appearance of the HR.
